# Supplementary material for: Sterblichkeitsentwicklung in Deutschland im internationalen Kontext
Source: Springer Nature journal article supplement (doi:10.1007/s00103-024-03867-9), 2024-04-18
Supplement: MOESM1 [file 26993792]

„Sterblichkeitsentwicklung in Deutschland im internationalen Kontext“

Abb. A1. Beiträge von Altersgruppen zum Unterschied in der Lebenserwartung bei Geburt; Westdeutschland versus Westeuropa-Länder (ohne Deutschland), 1990–2019

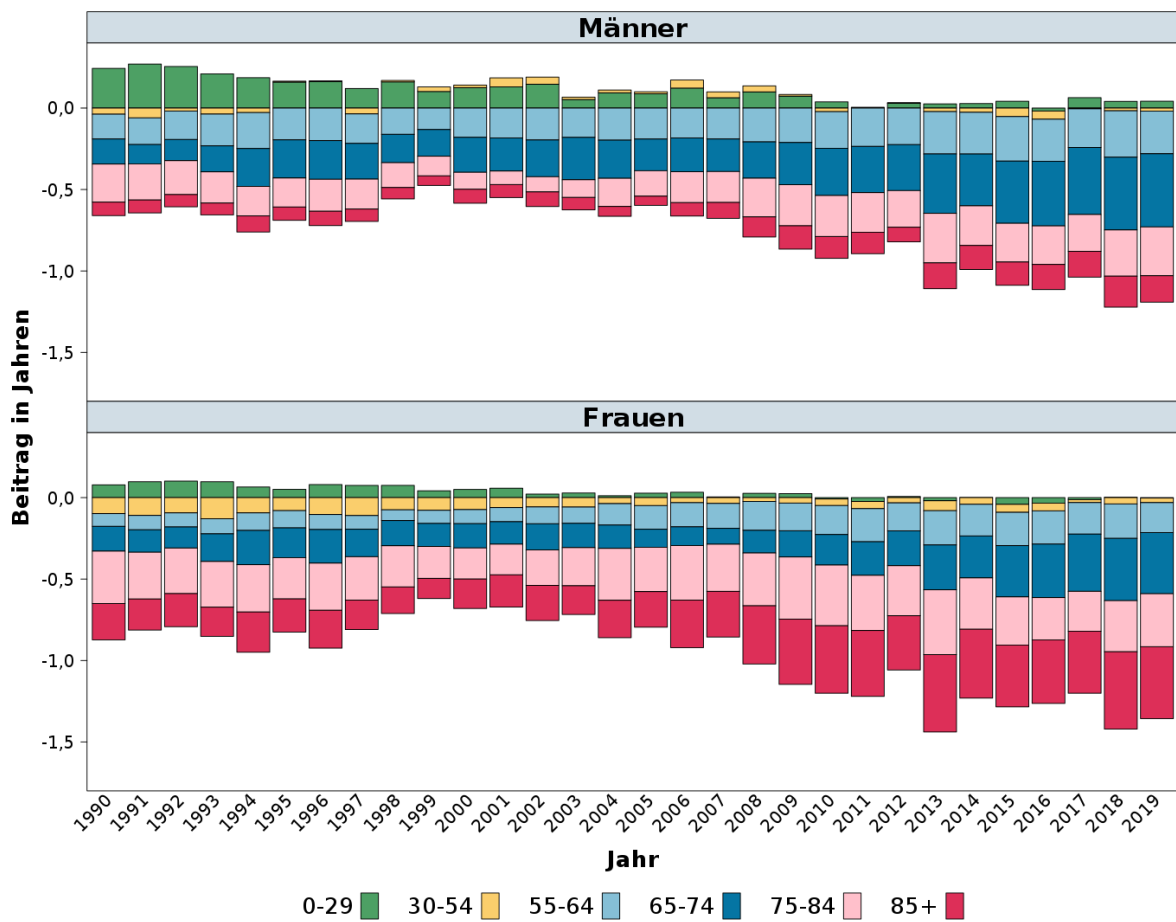

Quelle: Human Mortality Database ([www.mortality.org](http://www.mortality.org)), eigene Berechnungen und Abbildung

**Abb. A2. Sterblichkeit nach großen Gruppen von Todesursachen in Deutschland und anderen westeuropäischen Ländern; beide Geschlechter, 1990 und 2017**

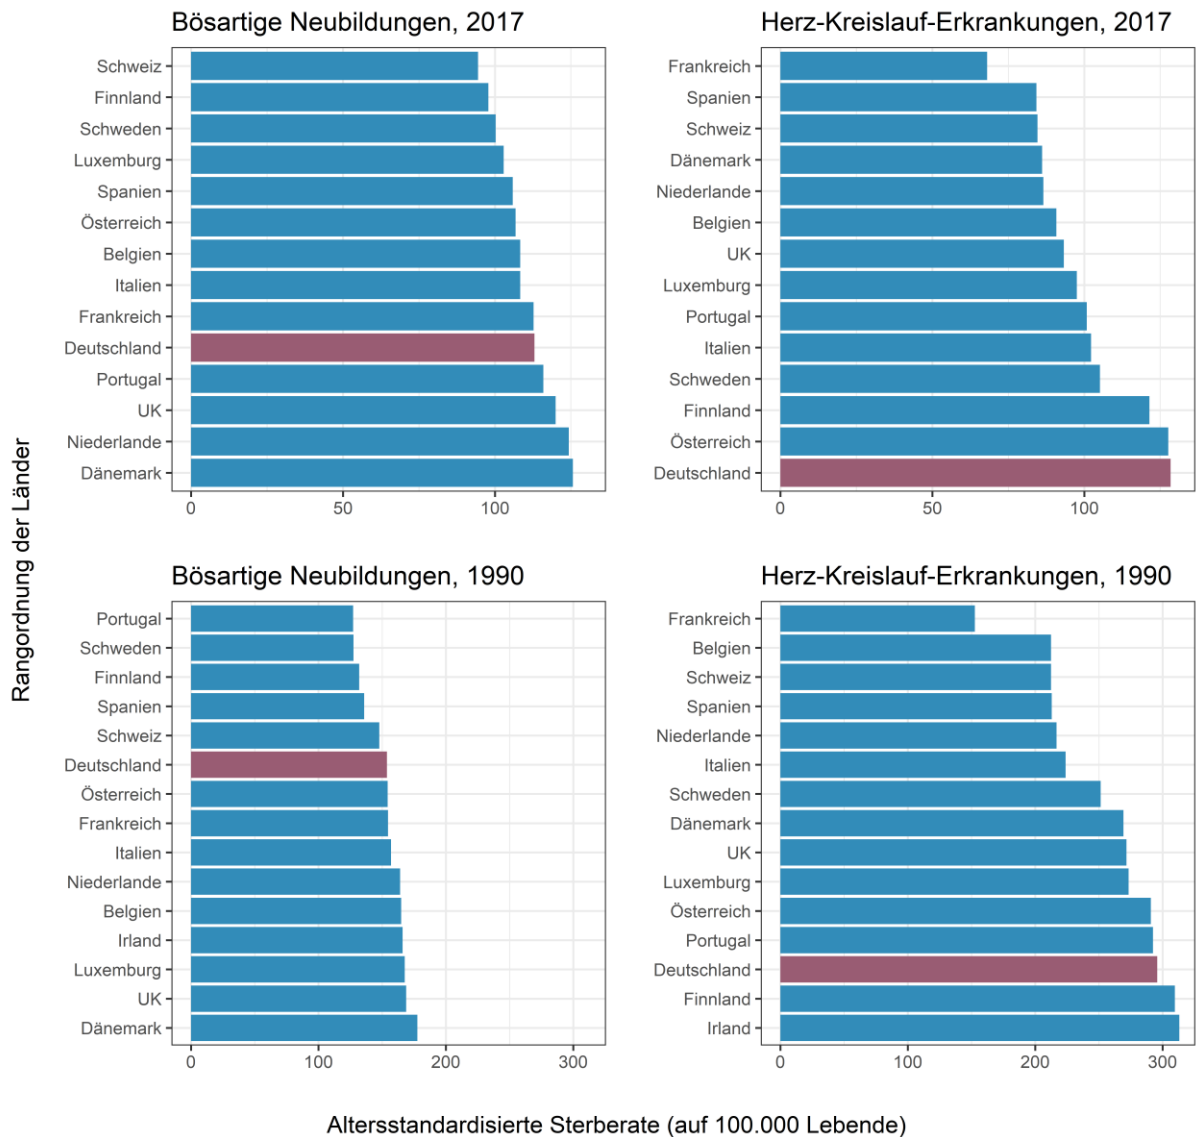

Quelle: WHO Mortality Database (<https://platform.who.int/mortality>), eigene Abbildung

**Abb. A3. Sterblichkeit nach großen Gruppen von Todesursachen in Deutschland und anderen westeuropäischen Ländern; beide Geschlechter, 1990**

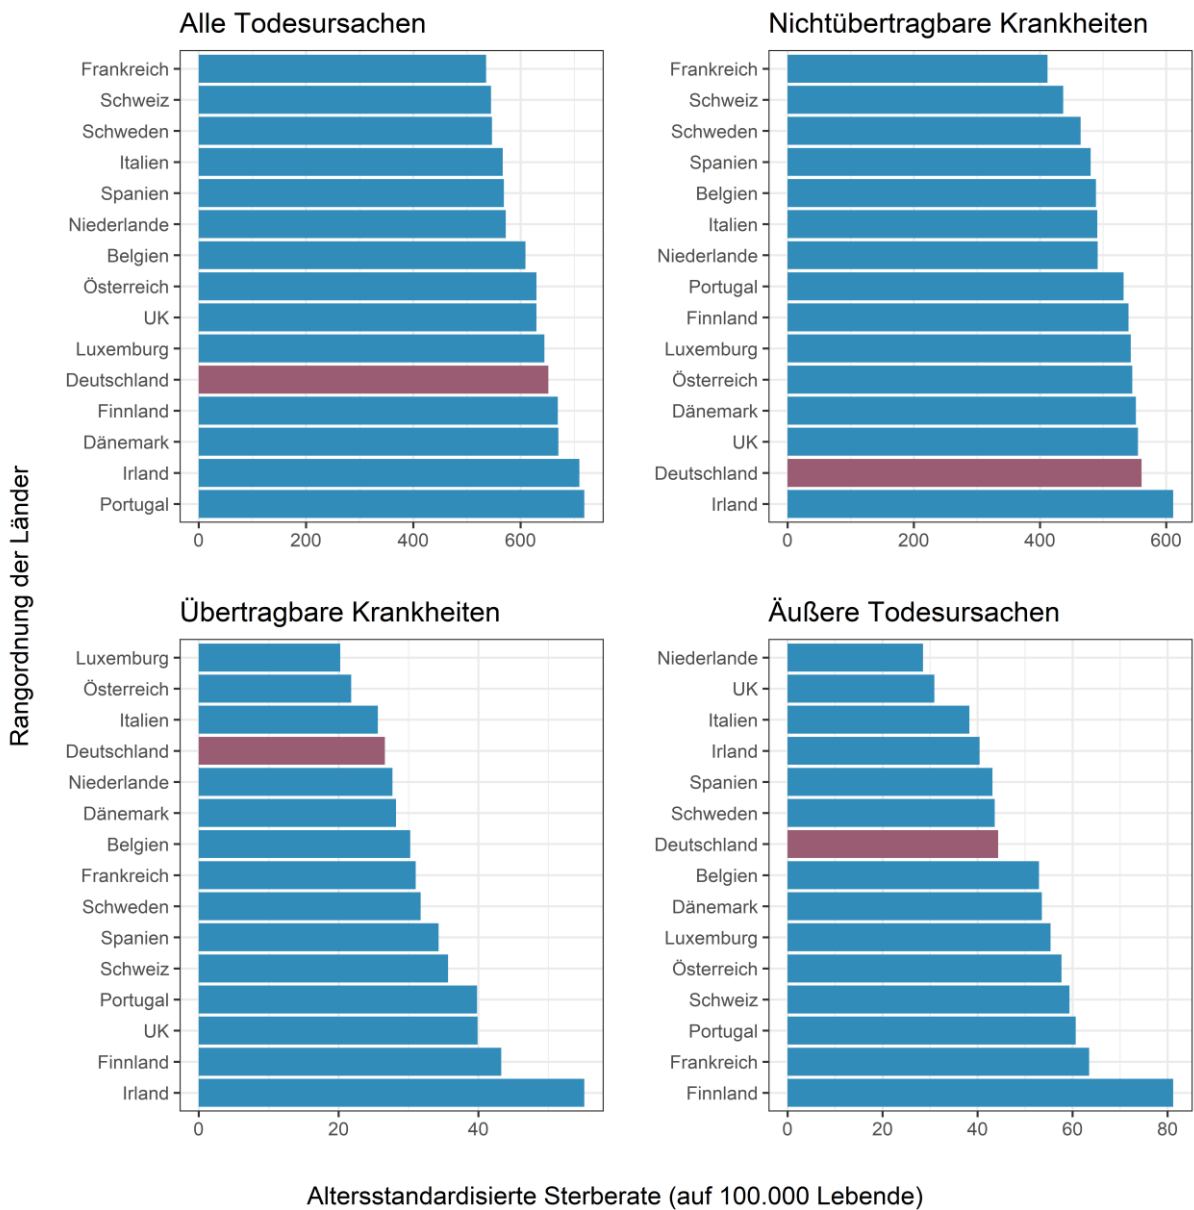

Quelle: WHO Mortality Database (<https://platform.who.int/mortality>), eigene Abbildung

**Abb. A4. Sterblichkeit nach großen Gruppen von Todesursachen in Deutschland und anderen westeuropäischen Ländern; Männer, 2017**

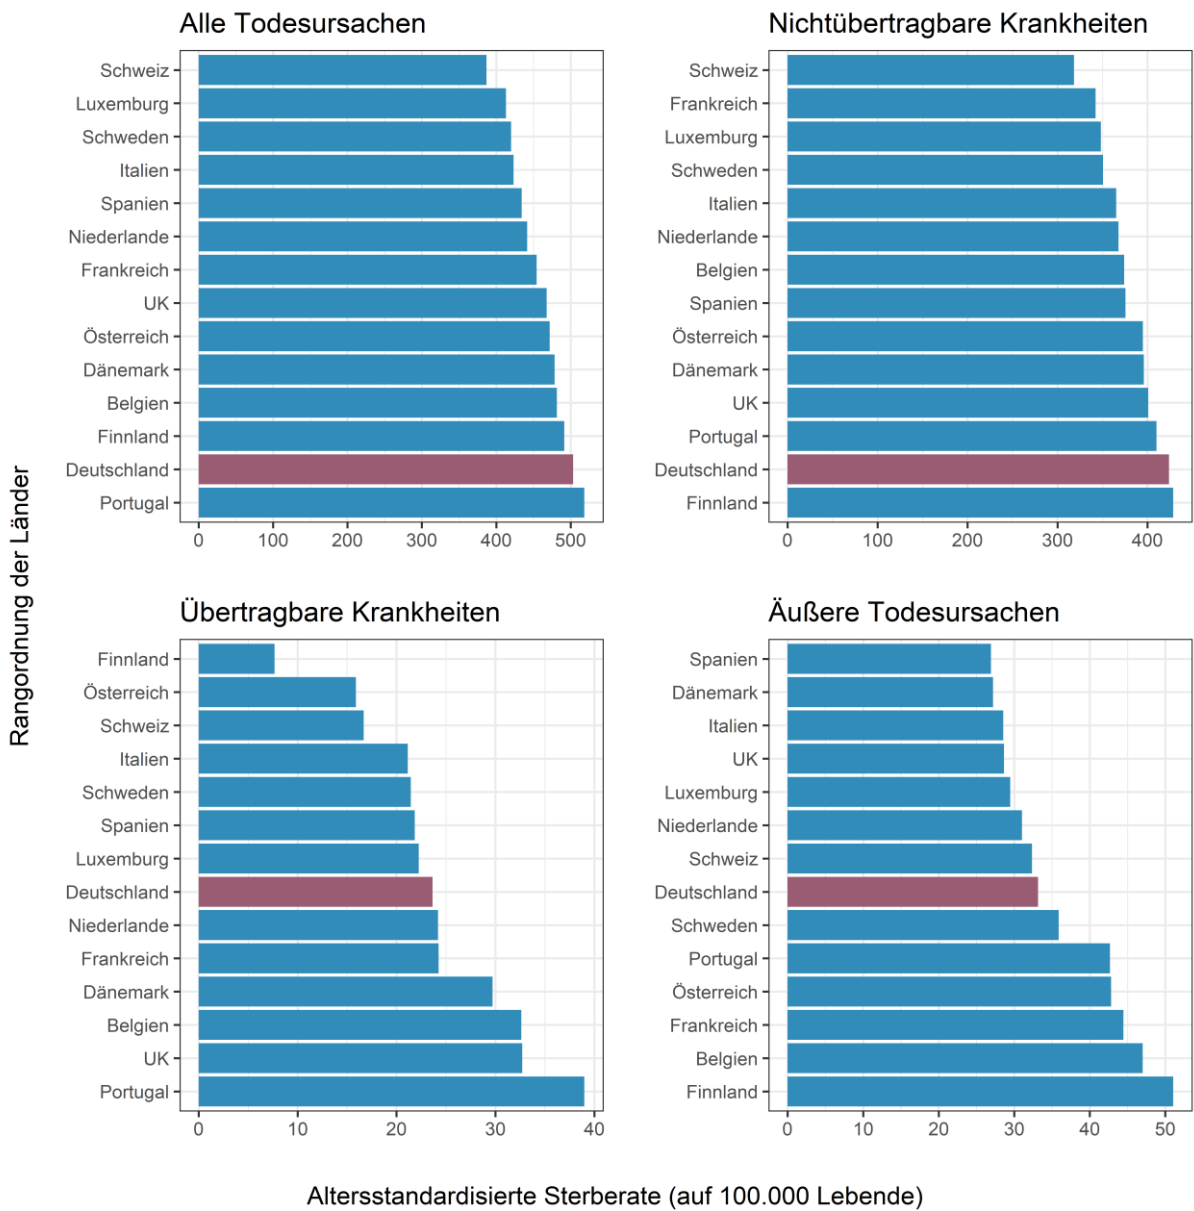

Quelle: WHO Mortality Database (<https://platform.who.int/mortality>), eigene Abbildung

**Abb. A5. Sterblichkeit nach großen Gruppen von Todesursachen in Deutschland und anderen westeuropäischen Ländern; Frauen, 2017**

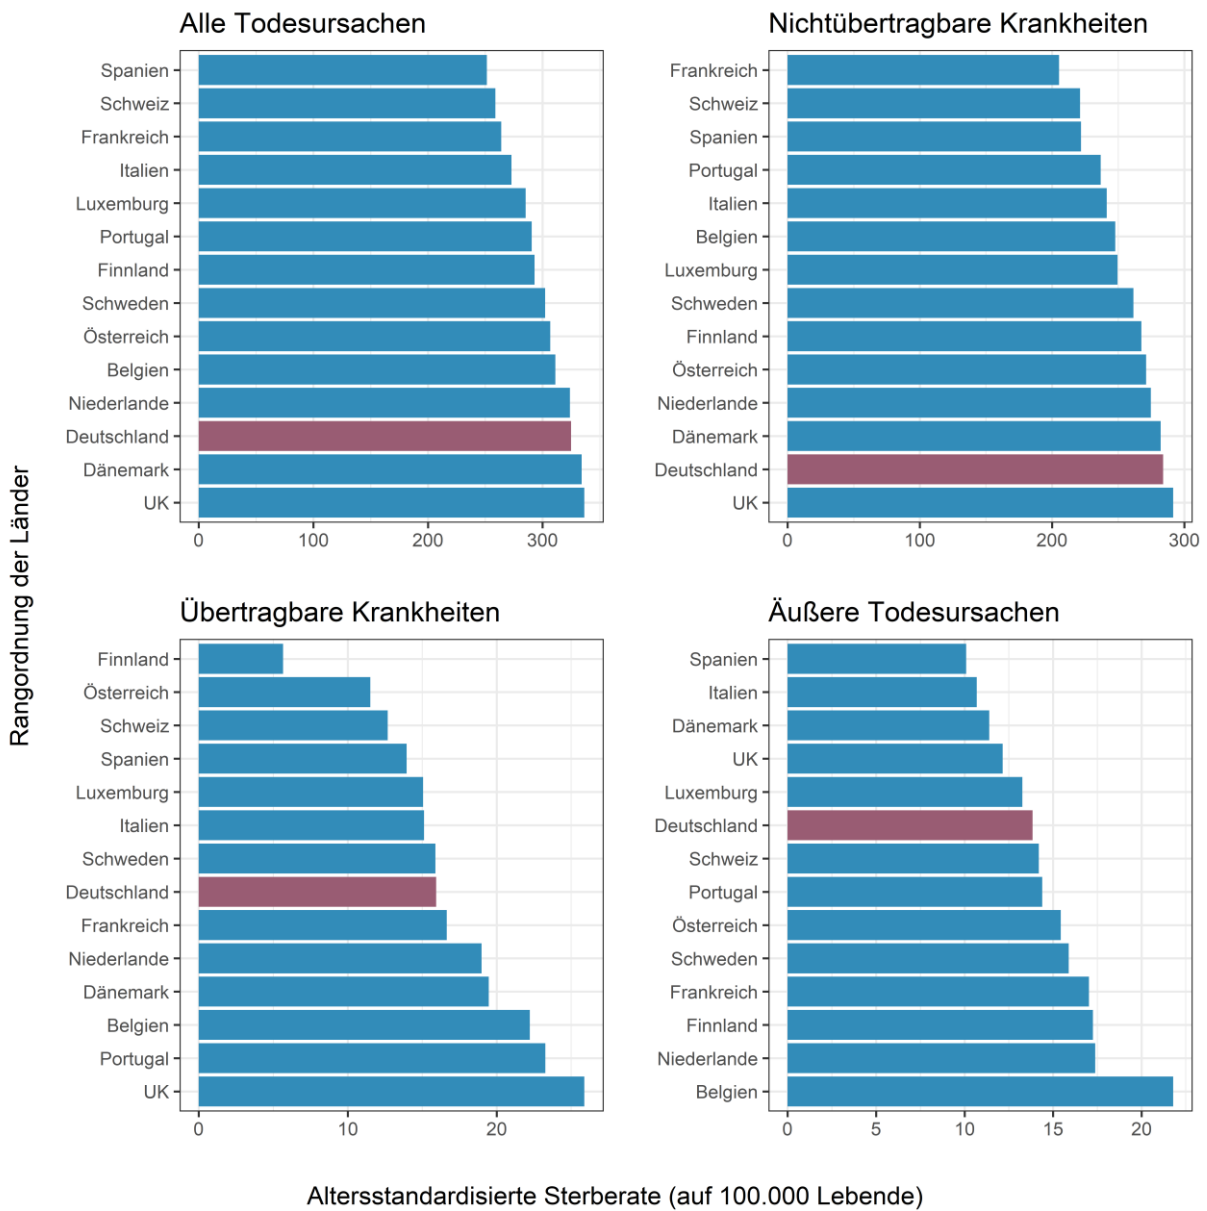

Quelle: WHO Mortality Database (<https://platform.who.int/mortality>), eigene Abbildung
